# Supplementary material for: Proteasome Inhibition Promotes Parkin-Ubc13 Interaction and Lysine 63-Linked Ubiquitination
Source: PubMed Central journal article supplement (PMC3759450; doi:10.1371/journal.pone.0073235), 2013-09-02

Figure S1

A

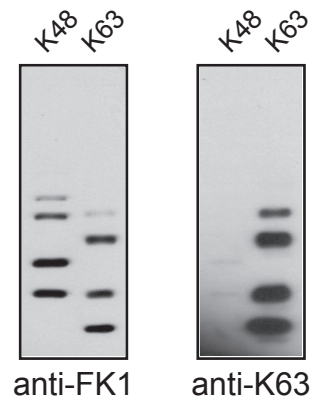

B

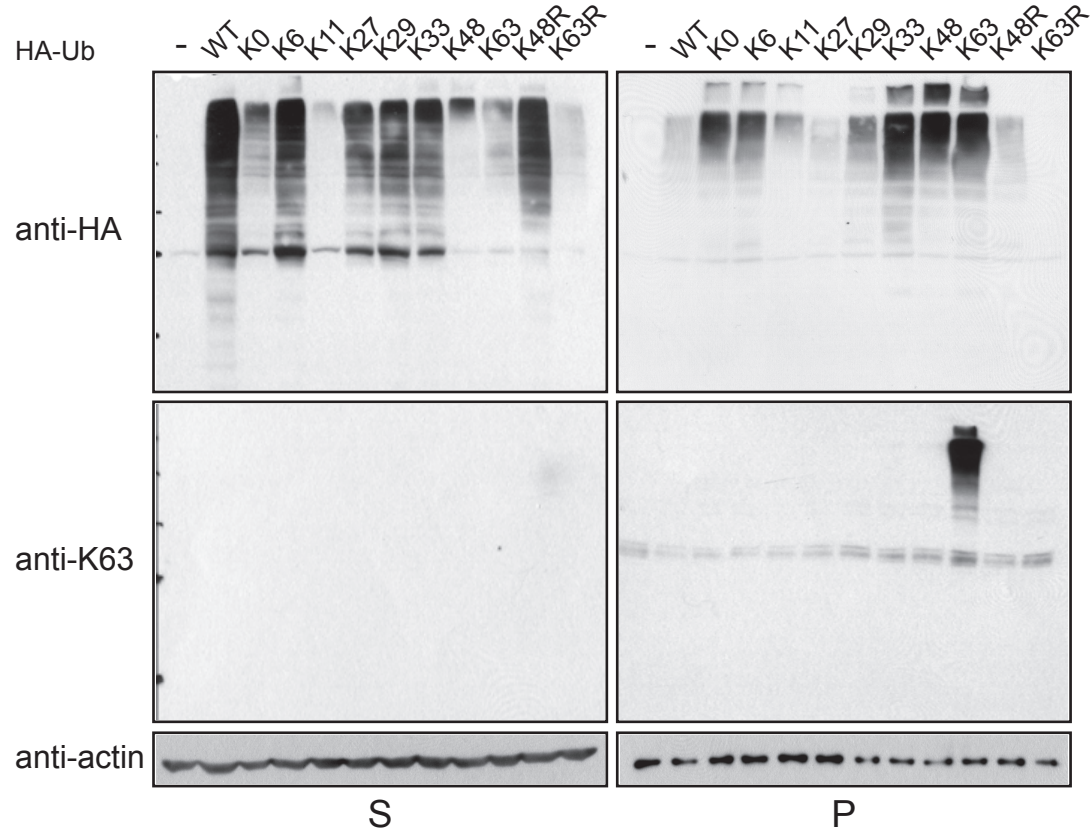

C

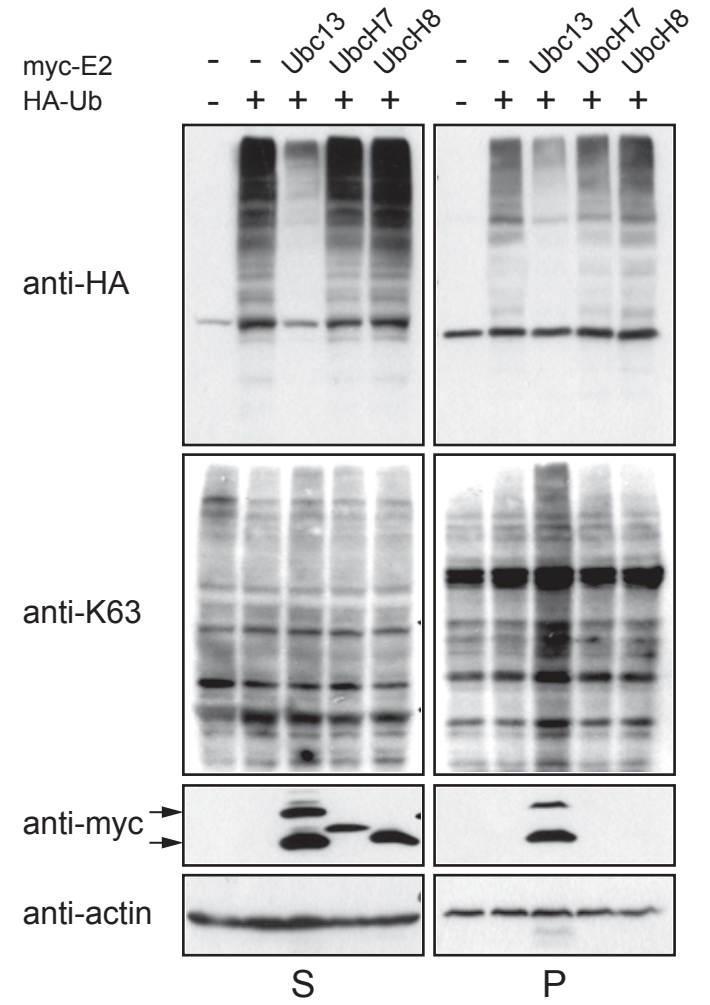

Supplement: pone.0073235.s001.pdf [file pone.0073235.s001.pdf]
